# Supplementary material for: Extraction and Purification of Highly Active Astaxanthin from Corynebacterium glutamicum Fermentation Broth
Source: MDPI journal article supplement (doi:10.3390/md21100530), 2023-10-11
Supplement: s1 [file s1]

## Extraction and purification of highly active astaxanthin from *Corynebacterium glutamicum* fermentation broth

\* Correspondence: n.henke@uni-bielefeld.de

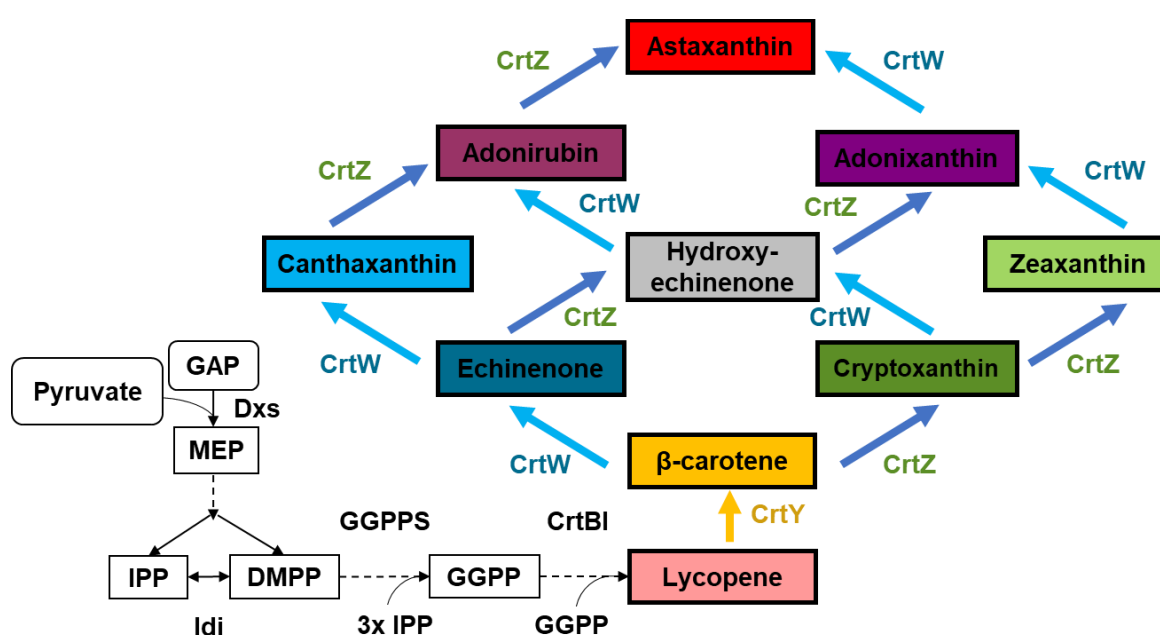

**Figure S1. Astaxanthin biosynthesis pathway in *C. glutamicum*.** Scheme of the astaxanthin biosynthesis pathway based on the central carbon metabolism, including respective precursor carotenoids. Heterologous expression of CrtY, CrtW, CrtZ. Enzymes are given in abbreviated form next to the reaction. GAP: Glyceraldehyde 3-phosphate; DXS: 1-deoxy-D-xylulose-5-phosphate synthase; MEP: 2-C-methyl-D-erythritol 4-phosphate pathway; IPP: Isopentenyl diphosphate; DMAPP: Dimethylallyl pyrophosphate; Idi: Isopentenyl pyrophosphate isomerase; GGPPS: Geranylgeranyl pyrophosphate synthase; GGPP: Geranylgeranyl pyrophosphate; CrtB: Phytoene synthase; CrtI: Phytoene desaturase; CrtY: Lycopene cyclase; CrtW:  $\beta$ -carotene ketolase; CrtZ:  $\beta$ -carotene hydroxylase.

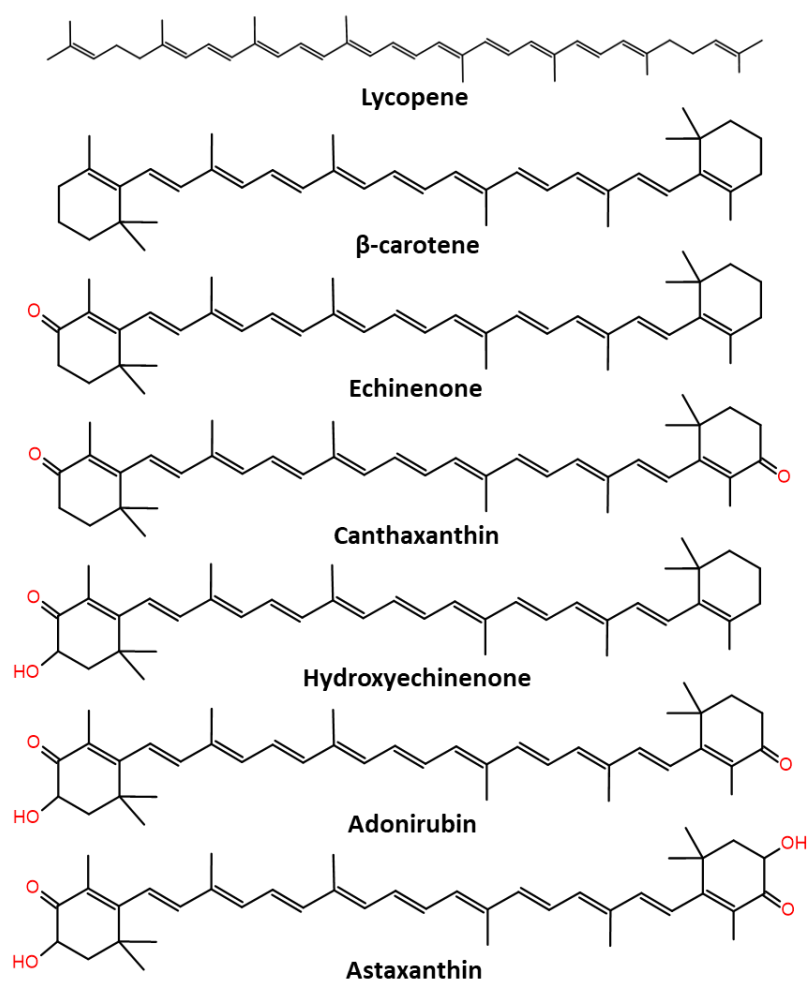

**Figure S2.** Structure of carotenoids detected by HPLC in this study. Oxy-functionalization is highlighted in red.
